# Supplementary material
Source: PubMed Central journal article supplement (PMC10294141)

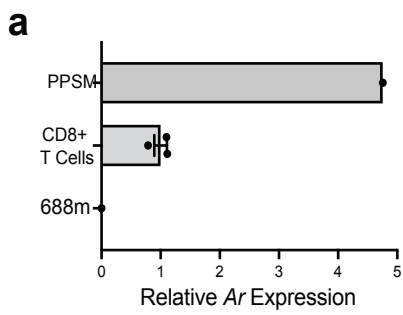

**b**

| Treatment                          | n  | number of cures | % cures |
|------------------------------------|----|-----------------|---------|
| rat IgG                            | 32 | 1               | 3.1     |
| $\alpha$ PDL1                      | 15 | 1               | 6.7     |
| enzalutamide                       | 10 | 0               | 0       |
| ADT + enzalutamide                 | 34 | 2               | 5.9     |
| ADT + enzalutamide + $\alpha$ PDL1 | 35 | 18              | 51.4    |

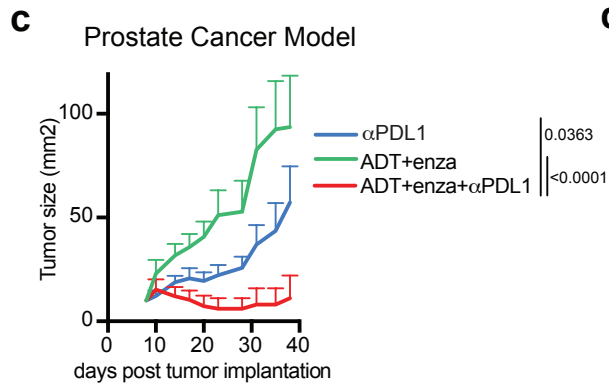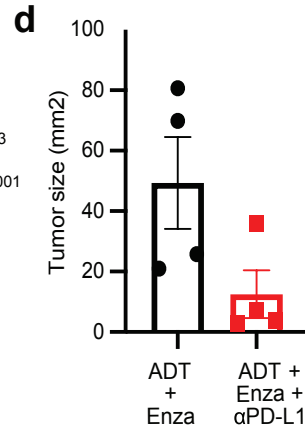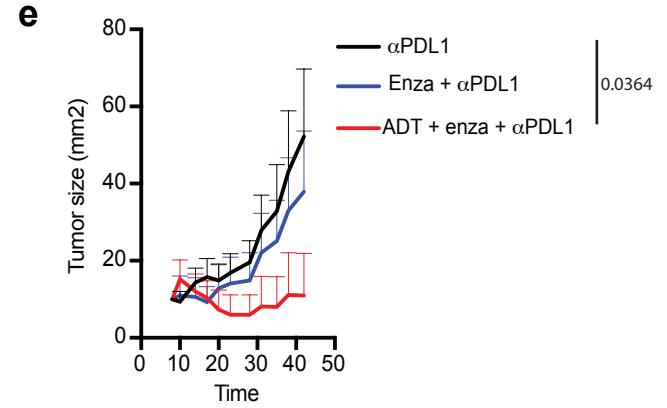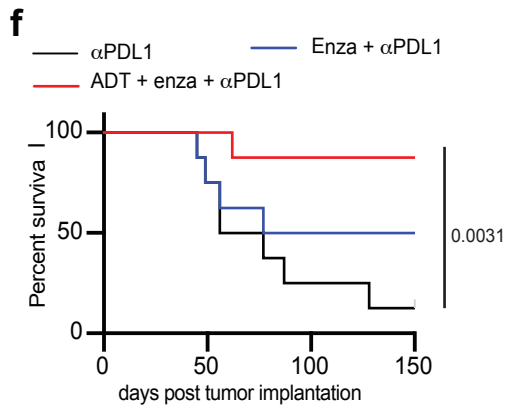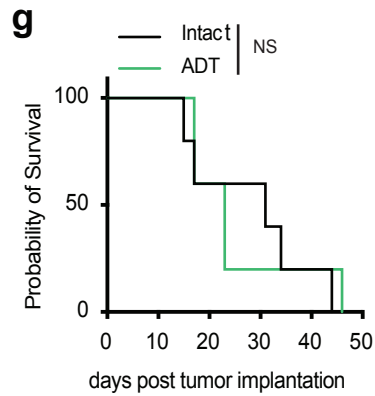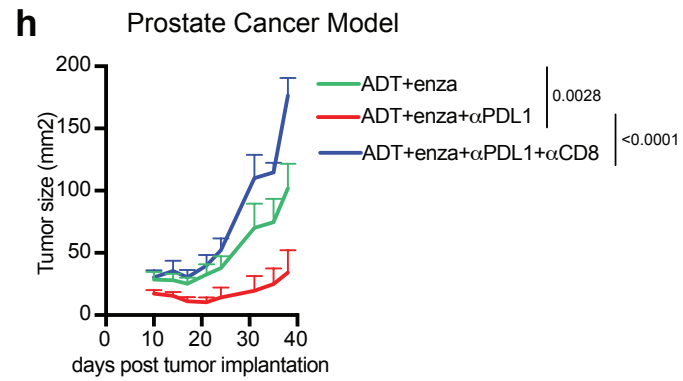

Supplement: NIHMS1899158-supplement-Supplementary_Fig_5.pdf [file NIHMS1899158-supplement-Supplementary_Fig_5.pdf]
