# Supplementary material
Source: PubMed Central journal article supplement (PMC10294141)

---

**Supplementary information**

---

**Androgen receptor activity in T cells limits checkpoint blockade efficacy**

---

In the format provided by the  
authors and unedited

## Supplementary Information

Immunohistochemical staining of androgen receptor (AR) in immune cells within the prostate cancer and non-cancer microenvironment.

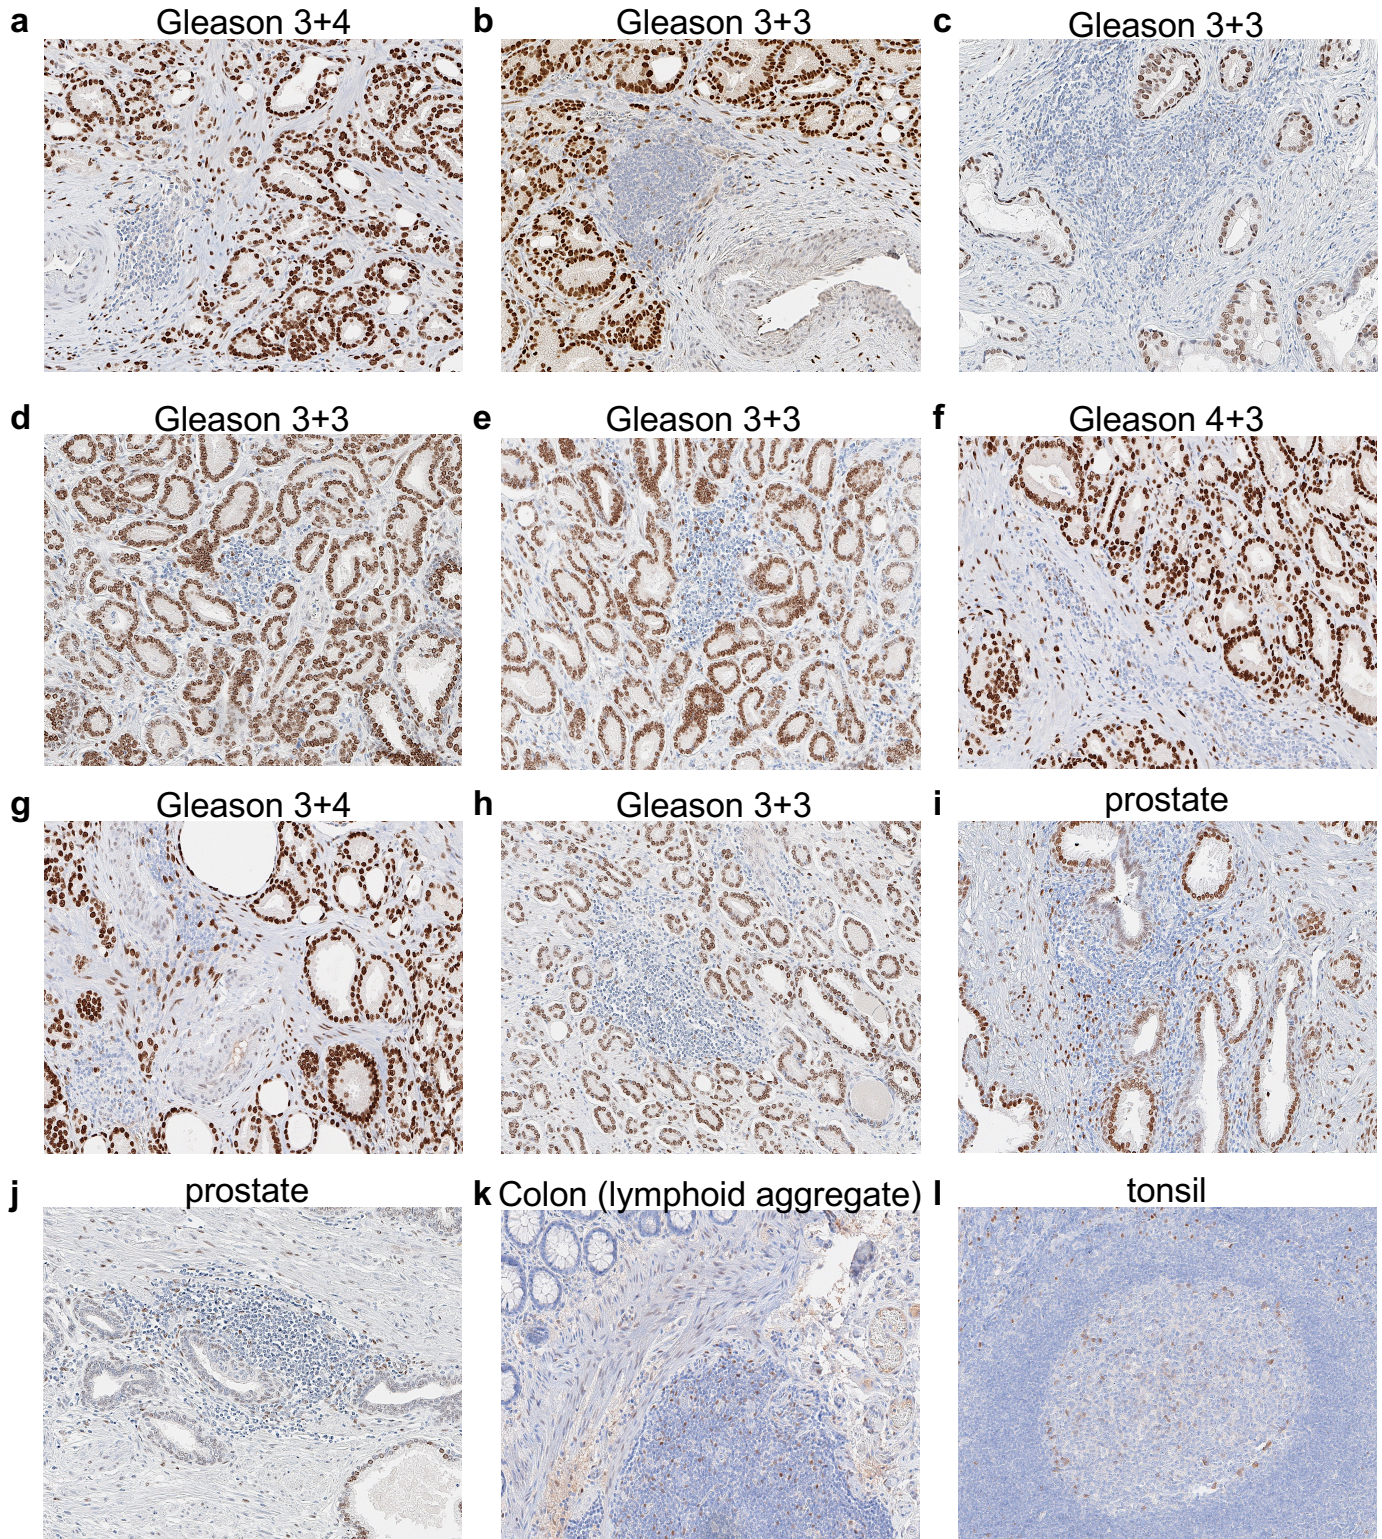

**Supplemental Figure 1.** a-h, Each panel represents a different prostate cancer from a different patient. Cancer cells have distinct glandular appearance, immune cells are dark blue. i-l, Each panel represents a different non-tumor tissue.

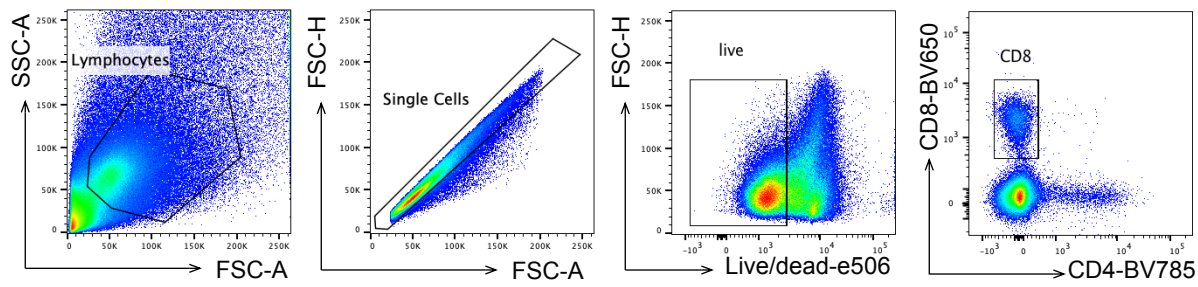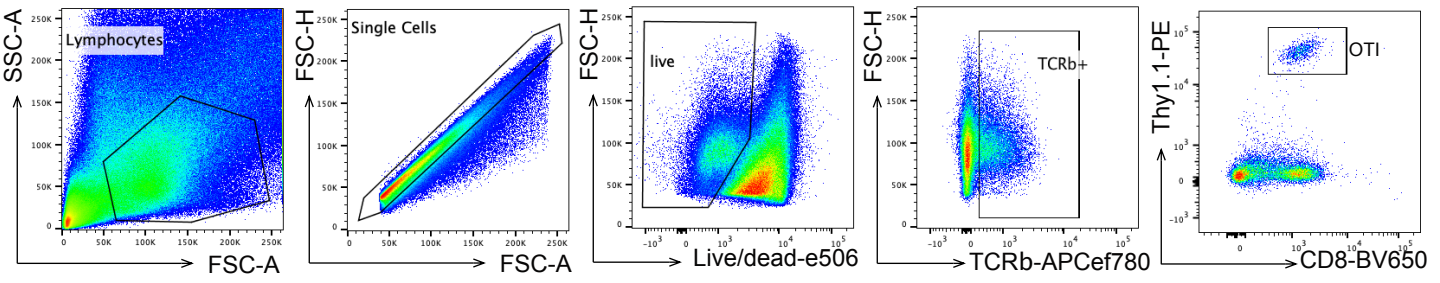

Supplement: NIHMS1899158-supplement-Supplementary_Figs_1-3.pdf [file NIHMS1899158-supplement-Supplementary_Figs_1-3.pdf]
