# Supplementary material
Source: PubMed Central journal article supplement (PMC10294141)

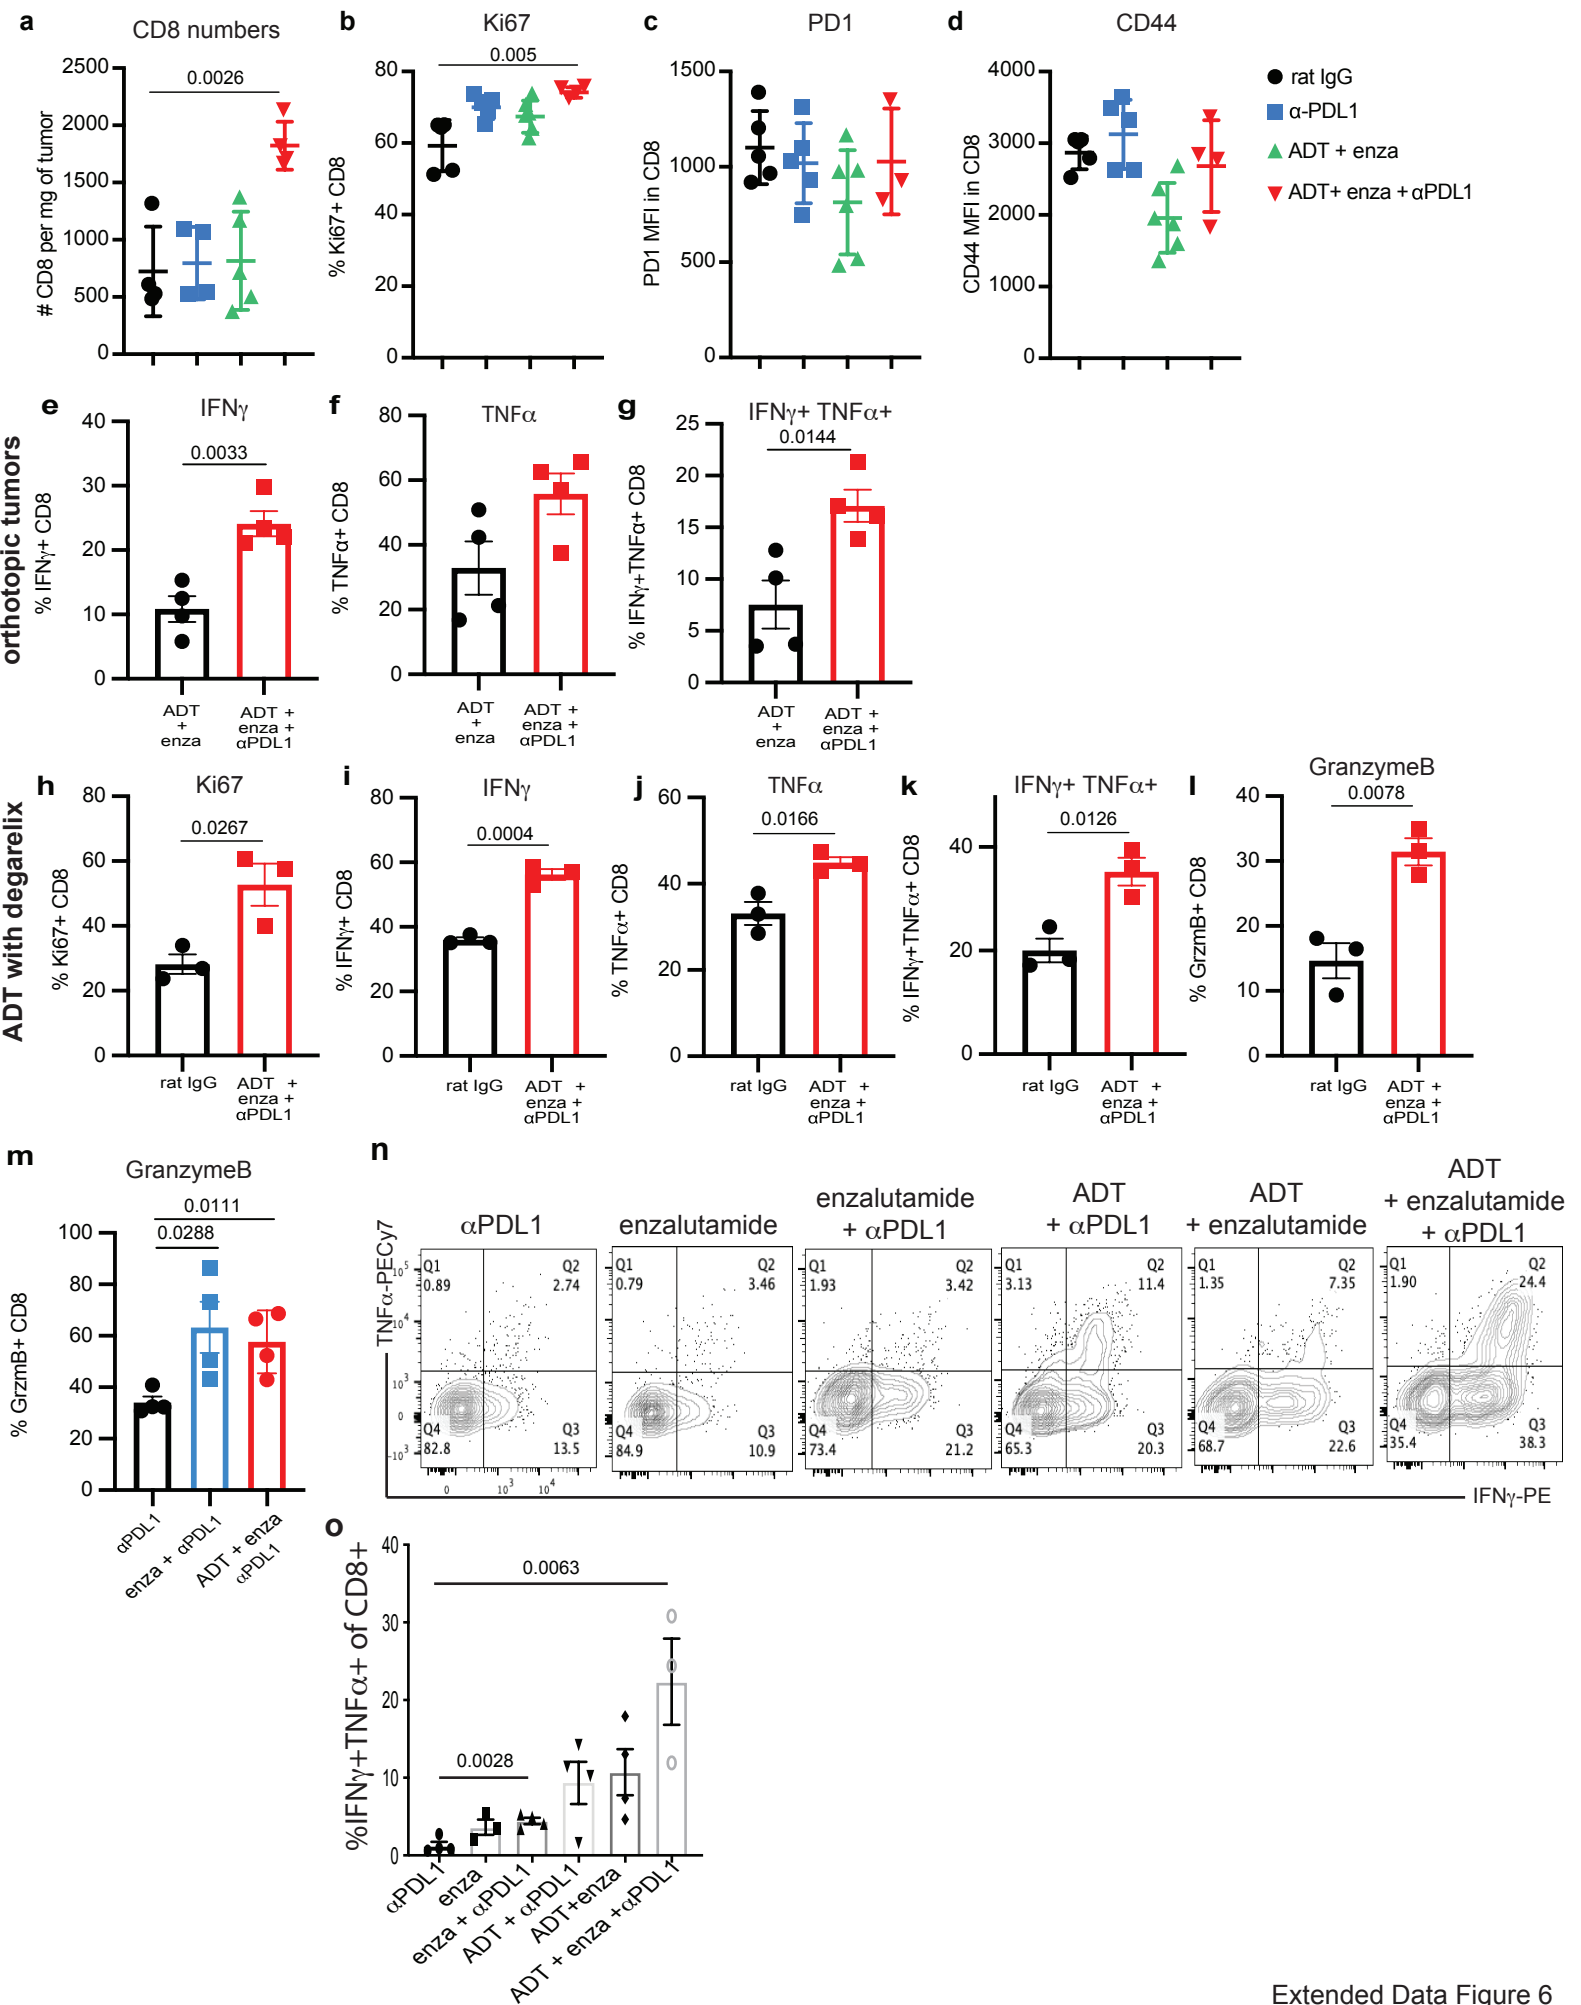

Supplement: NIHMS1899158-supplement-Supplementary_Fig_6.pdf [file NIHMS1899158-supplement-Supplementary_Fig_6.pdf]

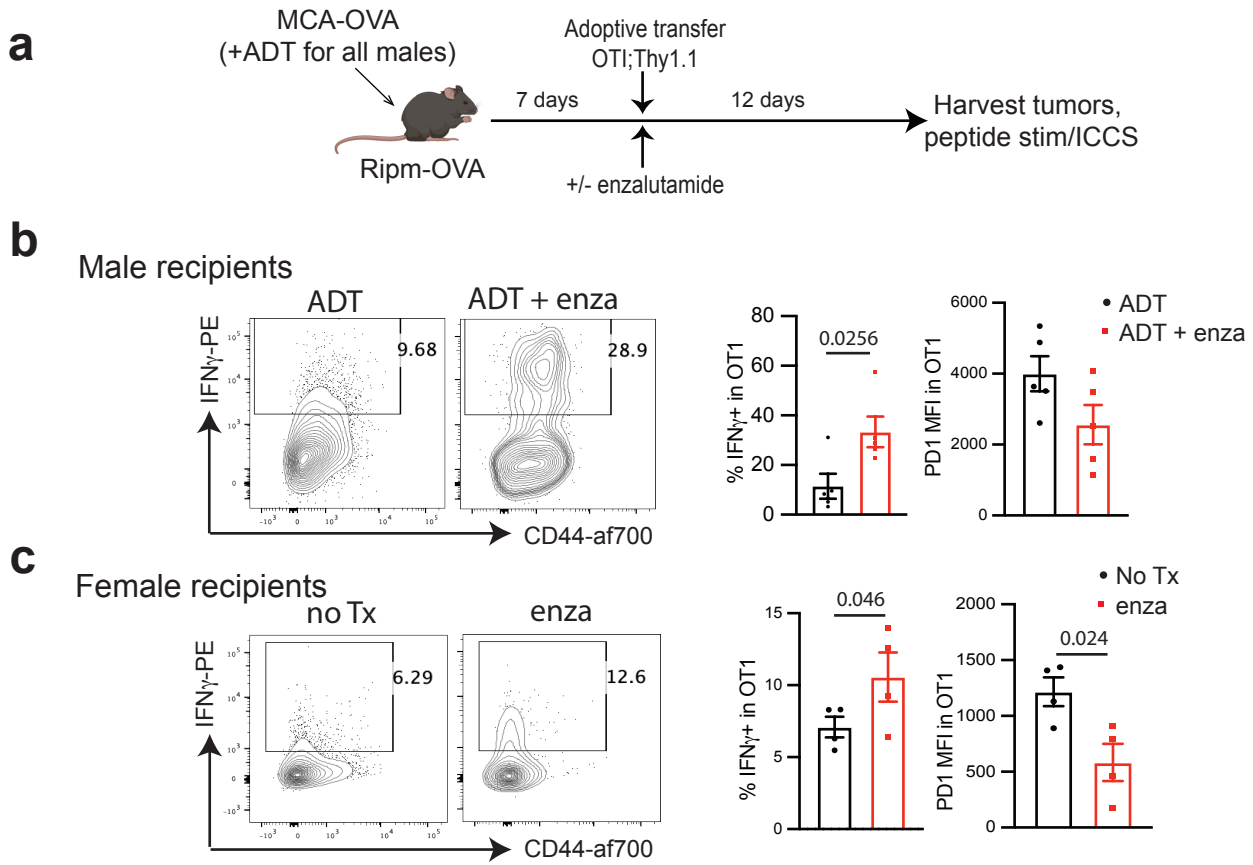

Extended Data Figure 7

Supplement: NIHMS1899158-supplement-Supplementary_Fig_7.pdf [file NIHMS1899158-supplement-Supplementary_Fig_7.pdf]

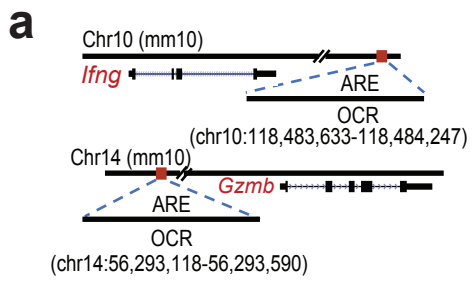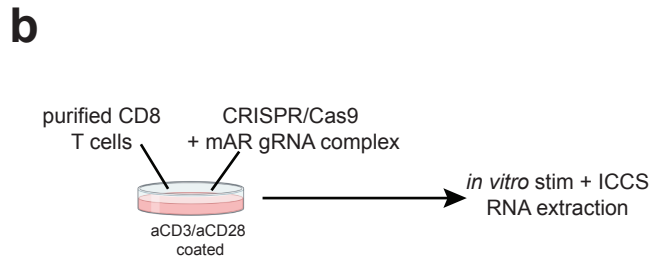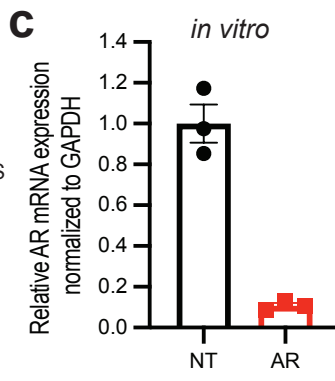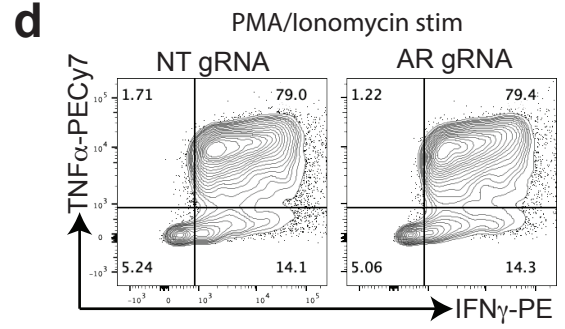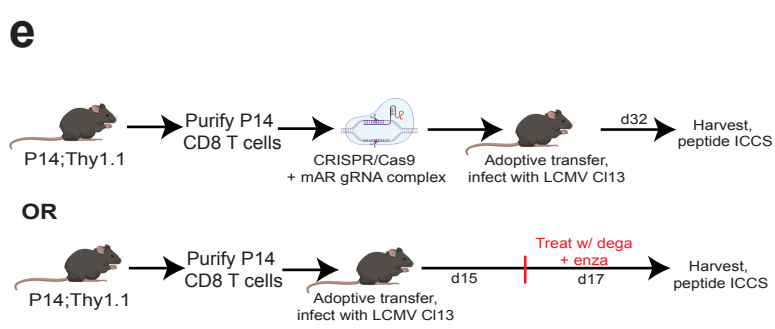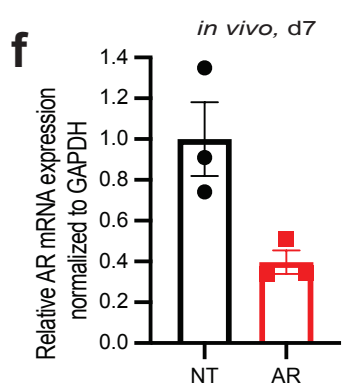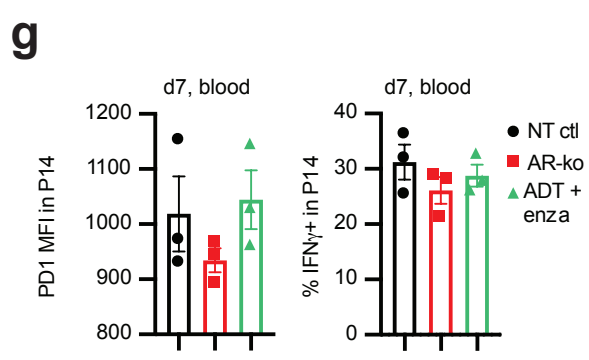

Extended Data Figure 8

Supplement: NIHMS1899158-supplement-Supplementary_Fig_8.pdf [file NIHMS1899158-supplement-Supplementary_Fig_8.pdf]
